# Supplementary material for: Variations in Genetic Diversity of Invasive Species Lithobates catesbeianus in China
Source: MDPI journal article supplement (doi:10.3390/ani14091287), 2024-04-25
Supplement: s1 [file s1]

## Supplementary Materials

# Variations in Genetic Diversity of Invasive Species *Lithobates catesbeianus* in China

Jiaqi Zhang <sup>1,2</sup>, Chunxia Xu <sup>1</sup>, Supen Wang <sup>1,†</sup>, Siqi Wang <sup>1,2</sup> and Yiming Li <sup>1,2,3,\*</sup>

<sup>1</sup> Key Laboratory of Animal Ecology and Conservation Biology, Institute of Zoology, Chinese Academy of Sciences, 1 Beichen West Road, Chaoyang, Beijing 100101, China; zhangjiaqi2025@163.com (J.Z.); xuchunxia0413@sina.com (C.X.); frog2019@ahnu.edu.cn (S.W.); wangsiqi17@mails.ucas.ac.cn (S.W.)

<sup>2</sup> University of Chinese Academy of Sciences, Beijing 100049, China

<sup>3</sup> School of Life Sciences, Institute of Life Sciences and Green Development, Hebei University, Baoding 071002, China

\* Correspondence: liym@ioz.ac.cn

† Current address: College of Life Science, Anhui Normal University, Wuhu 241008, China.

**Figure S1. The optimal number of clusters (best K value) for microsatellites (A) and SNPs (B) was determined using the  $\Delta K$  estimation method and implemented in STRUCTURE HARVESTER, as related to Figure 2 and Figure 4.**

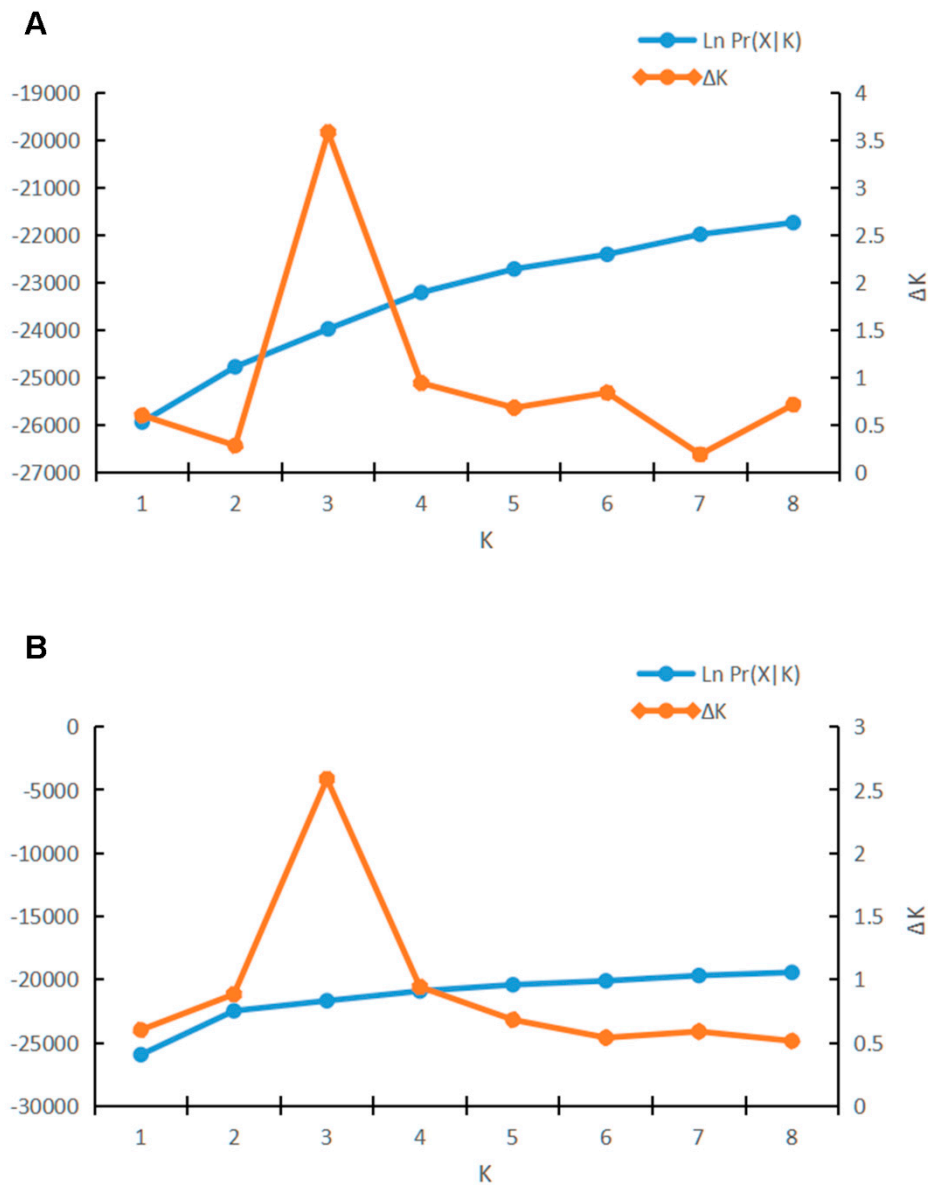

**Table S1. Population sampling localities, GPS coordinates, sample sizes (n) and information on introduction history of 10 bullfrog populations in this study.**

Number of generations between first introduction and sample date was calculated based on one generation =3 year (the mid value of minimum year and maximum year at mature, Stringham et al 2021). Introduction pathway includes escapes from bullfrog or release by people.

| site       | Coordinates E | Coordinates N | Collection Date (year-month) | Introduction date (no. of generations) | sample sizes (n) | Introduction pathway |
|------------|---------------|---------------|------------------------------|----------------------------------------|------------------|----------------------|
| ZheJiang   | 122.256       | 30.006        | 2013-7                       | 1994(8)                                | 10               | escape               |
| YunNan     | 102.601       | 23.674        | 2014-8                       | 1990(10)                               | 10               | escape               |
| AnHui      | 118.508       | 31.151        | 2013-8                       | 1985(12)                               | 10               | escape               |
| Tibet      | 91.108        | 29.668        | 2017-9                       | 1980(15)                               | 10               | release              |
| TianJin    | 117.511       | 38.932        | 2014-8                       | 1995(8)                                | 10               | escape               |
| HuNan      | 112.93        | 28.138        | 2013-8                       | 1959(22)                               | 10               | escape               |
| ShanDong   | 116.296       | 35.957        | 2015-8                       | 1988(11)                               | 10               | escape               |
| SiChuan    | 117.283       | 34.69         | 2015-8                       | 1985(12)                               | 10               | escape               |
| Kansas     | -98.505233    | 38.18017      | 2010-7                       | -                                      | 10               |                      |
| California | -121.628064   | 38.559753     | 2010-7                       | -                                      | 10               |                      |

**Table S2. Characteristics of the seventeen microsatellite loci used in the study.**

| Locus      | Primer sequence (5'-3')                                      | Repeat motif                    | Length (bp) | T <sub>a</sub> (°C) | Reference                  | Genbank # |
|------------|--------------------------------------------------------------|---------------------------------|-------------|---------------------|----------------------------|-----------|
| Rcat3-2b   | F: CACCCAACTAATTAGGATGGG<br>R: GGAATGGCATTGAGAGAGGG          | (AC)2AT(AC)12                   | 144         | 62                  | Austin <i>et al.</i> 2003  | AY323934  |
| RcatJ8     | F: CCATAGGAATCAAAACAACCTC<br>R: GGGATATGTGATGGACCCAAG        | (GT)18                          | 100         | 58                  | Austin <i>et al.</i> 2003  | AY323931  |
| RcatJ44b   | F: AGGTTAATGAAGCTCGGCAG<br>R: GGAGGCATCATATCAGAGAG           | (GT)22                          | 93          | 60                  | Austin <i>et al.</i> 2003  | AY323932  |
| RcatJ54    | F: TCATTACCACTGCCTTCTGC<br>R: TGCTGCTGTCCTATTGCTAG           | (CA)18                          | 183         | 60                  | Austin <i>et al.</i> 2003  | AY323930  |
| RcatJ21    | F-CCCATCTTATCCTGTGTACT<br>R-CAAGCCTCCATCTCACCTTACC           | (GT)25                          | 160–166     | 60                  | Austin <i>et al.</i> 2003  | AY323929  |
| RcatJ11    | F: CTCTTCCATTCACTGAC<br>R: AGGCGGAGCATATATTGTGG              | (CA)16C(CA)3                    | 124         | 60                  | Austin <i>et al.</i> 2003  | AY323928  |
| BF194      | F-CTGCTGTGGTATCTATGCTTTTT<br>R-CAACTGACATTTGCCAACA           | (TTTG)5                         | 163–258     | 55                  | Austin <i>et al.</i> 2011  | HQ439096  |
| BF195      | F-GGAGCCGAGTGTAACCTGAG<br>R-TGGACTCTATGCCAACCA               | (CA)33                          | 163–215     | 55                  | Austin <i>et al.</i> 2011  | HQ439097  |
| BF249      | F-CCATGGAATTTGCAGAATGA<br>R-GGCAAAAACCTGGCCTAAA              | (CA)11                          | 153–187     | 60                  | Austin <i>et al.</i> 2011  | HQ439093  |
| BF205      | F-GGAACCTCATTGAATTCG<br>R-GCGTCCCGATACTTTTGACA               | (TA)6(AC)8AGT(AG) <sub>36</sub> | 105–187     | 53                  | Austin <i>et al.</i> 2011  | HQ439094  |
| BF299      | F-TGTAGCAGCCAAATATCCTGAA<br>R-CTGTGTGTATGTGGCAACC            | (AGT)10                         | 130–157     | 60                  | Austin <i>et al.</i> 2011  | HQ439092  |
| Htiger510  | F: F9GTC -<br>CCCATCCTGTTCTTGTCAG<br>R: TACGGACTAAGCCTGGGATG | (AC)10                          | 85–129      | 58                  | Sultana <i>et al.</i> 2014 | AB911223  |
| Htiger303  | F: M13 - TTTCAGCCATGTCTGCTCAG<br>R: ACTGTTGGCGCATATTAATCC    | (TTA)12                         | 169–274     | 58                  | Sultana <i>et al.</i> 2014 | AB911228  |
| Htiger2248 | F: M13 -<br>CAAGACAGACCGCAAAGACG<br>R: AGCACCATCAGTTGTACAGTG | (AGAT)8                         | 169–274     | 58                  | Sultana <i>et al.</i> 2014 | AB911229  |
| Htiger156  | F: M13 - CCGGTGCACCTCTCTTATTC<br>R: GCAGGCGTTGGAAGTGAC       | (AGC)12                         | 135–192     | 58                  | Sultana <i>et al.</i> 2014 | AB911231  |

|            |                                   |                   |         |    |                        |          |
|------------|-----------------------------------|-------------------|---------|----|------------------------|----------|
| Htiger1931 | F: M13 - TGTTCTTGTTTGGGTGCTG      | (TG)12            | 123–257 | 58 | Sultana et al.<br>2014 | AB911236 |
|            | R: ACCAGACACAACCACCCTAG           |                   |         |    |                        |          |
| Htigr1409  | F: F9AGG -<br>ACACACCACCACTGCTCAG | (AC)4 .....(TG)10 | 101–124 | 58 | Sultana et al.<br>2014 | AB911222 |

1. Austin, J.D.; Davila, J.A.; Loughheed, S.C.; Boag, P.T. Genetic evidence for female-biased dispersal in the bullfrog, *Rana catesbeiana* (Ranidae). *Mol Ecol* 2003, 12, 3165–3172, doi:10.1046/j.1365-294x.2003.01948.x.
2. Austin, J.D.; Gorman, T.A.; Bishop, D. Assessing fine-scale genetic structure and relatedness in the micro-endemic Florida bog frog. *Conservation Genetics* 2011, 12, 833–838.
3. Sultana, N.; Igawa, T.; Nozawa, M.; Islam, M.M.; Hasan, M.; Alam, M.S.; Khan, M.M.R.; Sumida, M. Development and characterization of 27 new microsatellite markers for the Indian bullfrog *Hoplobatrachus tigerinus* and its congeneric species. *Genes & genetic systems* 2014, 89, 137–141.

**Table S3.** Pairwise  $F_{ST}$  values of microsatellites across 10 populations in this study. Significant level  $\alpha=0.0011$  after Bonferroni correction (0.05/45 pairs). The bold indicating significance.

|    | KS           | HN           | XZ           | SC           | YN           | SD           | CA           | ZJ           | AH    | TJ    |
|----|--------------|--------------|--------------|--------------|--------------|--------------|--------------|--------------|-------|-------|
| KS | 0.000        |              |              |              |              |              |              |              |       |       |
| HN | 0.123        | 0.000        |              |              |              |              |              |              |       |       |
| XZ | <b>0.283</b> | 0.034        | 0.000        |              |              |              |              |              |       |       |
| SC | <b>0.323</b> | 0.166        | <b>0.278</b> | 0.000        |              |              |              |              |       |       |
| YN | <b>0.320</b> | 0.140        | <b>0.351</b> | 0.103        | 0.000        |              |              |              |       |       |
| SD | <b>0.303</b> | <b>0.176</b> | <b>0.287</b> | 0.105        | 0.095        | 0.000        |              |              |       |       |
| CA | 0.138        | 0.166        | <b>0.273</b> | <b>0.258</b> | <b>0.220</b> | <b>0.254</b> | 0.000        |              |       |       |
| ZJ | <b>0.292</b> | <b>0.232</b> | <b>0.261</b> | <b>0.172</b> | <b>0.134</b> | <b>0.218</b> | <b>0.278</b> | 0.000        |       |       |
| AH | <b>0.372</b> | 0.127        | 0.137        | <b>0.168</b> | <b>0.176</b> | <b>0.196</b> | <b>0.299</b> | <b>0.248</b> | 0.000 |       |
| TJ | <b>0.361</b> | <b>0.184</b> | 0.101        | <b>0.198</b> | <b>0.177</b> | <b>0.191</b> | <b>0.340</b> | <b>0.253</b> | 0.093 | 0.000 |

**Table S4. RAD sequencing quality statistics**

| Sample ID | Clean Reads | Clean Base | GC (%) | Q30(%) |
|-----------|-------------|------------|--------|--------|
| AH_1      | 18933617    | 5594733057 | 43.63  | 92.89  |
| AH_2      | 14260467    | 4228477829 | 43.67  | 92.84  |
| AH_3      | 20166563    | 5938749168 | 43.78  | 92.97  |
| AH_4      | 18550176    | 5463008232 | 43.88  | 92.93  |
| AH_5      | 19123211    | 5612716006 | 43.72  | 92.95  |
| AH_6      | 21170405    | 6213330742 | 43.76  | 92.94  |
| AH_7      | 17783993    | 5218760643 | 43.75  | 93.18  |
| AH_8      | 18109856    | 5314237612 | 43.78  | 92.97  |
| AH_9      | 20693378    | 6073429041 | 43.64  | 93.15  |
| AH_10     | 15990704    | 4691588395 | 43.77  | 93.27  |
| XZ_1      | 21054450    | 6222738702 | 43.76  | 93.46  |
| XZ_2      | 11091992    | 3280508002 | 43.53  | 93.96  |
| XZ_3      | 18329298    | 5397211555 | 43.81  | 93.53  |
| XZ_4      | 24558908    | 7234682860 | 43.86  | 93.51  |
| XZ_5      | 19282954    | 5659966963 | 43.92  | 93.5   |
| XZ_6      | 27562649    | 8091983871 | 43.69  | 93.51  |
| XZ_7      | 23062761    | 6769830194 | 43.76  | 93.68  |
| XZ_8      | 13725211    | 4027314467 | 43.87  | 93.56  |
| XZ_9      | 16726801    | 4908925078 | 43.8   | 93.76  |
| XZ_10     | 15611330    | 4582169415 | 43.81  | 93.78  |
| TJ_1      | 9282114     | 2741787728 | 43.72  | 93.37  |
| TJ_2      | 9295428     | 2747626621 | 43.61  | 93.86  |
| TJ_3      | 12923413    | 3802045533 | 43.51  | 93.81  |
| TJ_4      | 8993001     | 2646657488 | 43.83  | 93.41  |
| TJ_5      | 9257081     | 2715549051 | 43.72  | 93.41  |
| TJ_6      | 8635605     | 2541723312 | 44.29  | 93.12  |
| TJ_7      | 11715911    | 3465700376 | 43.88  | 93.38  |
| TJ_8      | 19296466    | 5670593211 | 43.69  | 93.49  |

**Table S4. sequencing quality statistics (continued)**

| Sample ID | Clean Reads | Clean Base | GC (%) | Q30(%) |
|-----------|-------------|------------|--------|--------|
| TJ_9      | 18292481    | 5358215732 | 43.78  | 93.47  |
| TJ_10     | 15562261    | 4557144277 | 43.74  | 93.49  |
| JZ_1      | 20808325    | 6108521853 | 43.73  | 93.4   |
| JZ_2      | 17411987    | 5110119042 | 43.92  | 93.41  |
| JZ_3      | 17553086    | 5148087099 | 44.14  | 93.34  |
| JZ_4      | 19941391    | 5852211657 | 43.65  | 93.61  |
| JZ_5      | 17208648    | 5051755785 | 43.87  | 93.62  |
| JZ_6      | 20656440    | 6100469330 | 44.01  | 93.01  |
| JZ_7      | 13875362    | 4114093278 | 44.25  | 92.91  |
| JZ_8      | 30350918    | 8897720127 | 44.21  | 93.61  |
| JZ_9      | 26819593    | 7869614126 | 44.01  | 93.84  |
| JZ_10     | 22364797    | 6563232834 | 44.03  | 93.87  |
| ZJ_1      | 21878197    | 6445171345 | 43.91  | 93.07  |
| ZJ_2      | 19540310    | 5737009972 | 43.84  | 93.04  |
| ZJ_3      | 16097388    | 4724751944 | 43.89  | 93.07  |
| ZJ_4      | 19513768    | 5728907068 | 43.77  | 93.26  |
| ZJ_5      | 20303941    | 5961085130 | 43.76  | 93.09  |
| ZJ_6      | 15898627    | 4665787279 | 43.85  | 93.3   |
| ZJ_7      | 13991497    | 4106892902 | 43.91  | 93.29  |
| ZJ_8      | 23645070    | 6988350243 | 43.94  | 92.44  |
| ZJ_9      | 15589363    | 4623218678 | 44.01  | 92.33  |
| SC_1      | 21128504    | 6222158275 | 43.92  | 92.5   |
| SC_2      | 18646197    | 5472783520 | 43.88  | 92.48  |
| SC_3      | 18629390    | 5468255156 | 43.78  | 92.51  |
| SC_4      | 18348035    | 5384925435 | 43.74  | 92.89  |
| SC_5      | 19060646    | 5594288047 | 43.77  | 92.55  |
| SC_6      | 17203955    | 5049207269 | 43.78  | 92.74  |
| SC_7      | 15011417    | 4405711067 | 43.83  | 92.82  |
| SC_8      | 19547171    | 5774216145 | 43.7   | 93.65  |
| SC_9      | 19620909    | 5757076985 | 43.88  | 93.75  |
| SC_10     | 16143634    | 4753209398 | 43.79  | 93.75  |



**Table S4. sequencing quality statistics (continued)**

| Sample ID | Clean Reads | Clean Base    | GC (%) | Q30(%) |
|-----------|-------------|---------------|--------|--------|
| YN_1      | 11894561    | 3498911851    | 44.28  | 93.66  |
| YN_2      | 11720290    | 3436643662    | 44.27  | 93.63  |
| YN_3      | 13113933    | 3847427753    | 44.08  | 93.69  |
| YN_4      | 9379428     | 2749530396    | 44.32  | 93.83  |
| YN_5      | 18862207    | 5566714600    | 43.55  | 93.43  |
| YN_6      | 22367859    | 6578926204    | 43.76  | 93.48  |
| YN_7      | 27760283    | 8140333211    | 43.52  | 93.57  |
| YN_8      | 19348527    | 5670718101    | 43.52  | 93.5   |
| YN_9      | 20426130    | 5987250295    | 43.64  | 93.65  |
| YN_10     | 17427734    | 5109453821    | 43.57  | 93.72  |
| SD_1      | 18072383    | 5339991120    | 43.8   | 93.39  |
| SD_2      | 15042932    | 4414136332    | 43.99  | 93.51  |
| SD_3      | 13602952    | 4005688793    | 44.2   | 93.42  |
| SD_4      | 18916227    | 5569640822    | 44.11  | 93.39  |
| SD_5      | 8847789     | 2623070035    | 44.14  | 93.29  |
| SD_6      | 15976038    | 4688546859    | 44.22  | 93.39  |
| SD_7      | 13489051    | 3957861924    | 44.52  | 93.56  |
| SD_8      | 22646202    | 6644878253    | 44.6   | 93.4   |
| SD_9      | 25664065    | 7532188845    | 44.14  | 93.61  |
| SD_10     | 18719770    | 5493107010    | 44.15  | 93.66  |
| HN_1      | 22780579    | 6,728,193,256 | 44     | 93.47  |
| HN_2      | 10351052    | 3,066,220,612 | 44     | 93.43  |
| HN_3      | 24203760    | 7,124,730,417 | 44     | 93.53  |
| HN_4      | 10184812    | 2,994,388,489 | 44     | 93.62  |
| HN_5      | 12561098    | 3,680,804,138 | 44     | 93.55  |
| HN_6      | 16882141    | 4,949,548,448 | 44     | 93.54  |
| HN_7      | 16015052    | 4,693,308,655 | 44     | 93.71  |
| HN_8      | 13251306    | 3,883,138,571 | 44     | 93.61  |
| HN_9      | 16714949    | 4,899,745,929 | 44     | 93.76  |
| HN_10     | 13858774    | 4,063,126,772 | 44     | 93.82  |

**Table S4. sequencing quality statistics (continued)**

| Sample ID | Clean Reads | Clean Base    | GC (%) | Q30(%) |
|-----------|-------------|---------------|--------|--------|
| MK_1      | 10847858    | 3,195,741,564 | 44     | 93.1   |
| MK_2      | 17142933    | 5075121063    | 44.61  | 92.86  |
| MK_3      | 22616853    | 6656452485    | 43.98  | 93.06  |
| MK_4      | 24897667    | 7329628297    | 43.99  | 93.06  |
| MK_5      | 14966490    | 4,384,572,014 | 44     | 93.12  |
| MK_6      | 12298038    | 3,603,441,647 | 44     | 93.43  |
| MK_7      | 16984005    | 4,976,391,157 | 44     | 93.27  |
| MK_8      | 13648316    | 4,002,048,923 | 44     | 93.1   |
| MK_9      | 12977373    | 3,801,778,235 | 44     | 93.35  |
| MK_10     | 12111238    | 3545652255    | 43.74  | 93.71  |

**Table S5. Coverage depth and degree statistics of RAD-seq of bullfrog samples**

| Sample ID | Covered Bases(bp) | Coverage<br>1X (%) | Coverage<br>5X (%) | Average Depth<br>(x) |
|-----------|-------------------|--------------------|--------------------|----------------------|
| AH_1      | 1,299,132,220     | 20.78              | 5.52               | 0.88                 |
| AH_2      | 1,023,283,503     | 16.37              | 4.09               | 0.67                 |
| AH_3      | 1,357,359,785     | 21.72              | 5.96               | 0.94                 |
| AH_4      | 1,266,829,971     | 20.27              | 5.43               | 0.86                 |
| AH_5      | 1,296,638,676     | 20.75              | 5.59               | 0.89                 |
| AH_6      | 1,391,521,366     | 22.26              | 6.22               | 0.98                 |
| AH_7      | 1,227,933,775     | 19.65              | 5.14               | 0.83                 |
| AH_8      | 1,247,925,390     | 19.97              | 5.28               | 0.84                 |
| AH_9      | 1,366,883,282     | 21.87              | 6.09               | 0.96                 |
| AH_10     | 1,097,812,925     | 17.56              | 4.46               | 0.73                 |
| XZ_1      | 1,237,098,614     | 19.79              | 6.63               | 0.98                 |
| XZ_2      | 859,306,977       | 13.75              | 3.11               | 0.52                 |
| XZ_3      | 1,115,365,182     | 17.84              | 5.72               | 0.85                 |
| XZ_4      | 1,357,763,401     | 21.72              | 7.78               | 1.14                 |
| XZ_5      | 1,154,132,046     | 18.47              | 6                  | 0.9                  |
| XZ_6      | 1,457,052,424     | 23.31              | 8.73               | 1.28                 |
| XZ_7      | 1,323,044,572     | 21.17              | 7.2                | 1.07                 |
| XZ_8      | 900,384,378       | 14.41              | 4.17               | 0.64                 |
| XZ_9      | 1,038,871,397     | 16.62              | 5.16               | 0.78                 |
| XZ_10     | 978,951,665       | 15.66              | 4.8                | 0.73                 |
| TJ_1      | 881,981,999       | 14.11              | 2.01               | 0.43                 |
| TJ_2      | 908,948,095       | 14.54              | 1.98               | 0.43                 |
| TJ_3      | 1,220,533,743     | 19.53              | 2.86               | 0.6                  |
| TJ_4      | 865,743,900       | 13.85              | 1.88               | 0.42                 |
| TJ_5      | 878,666,906       | 14.06              | 1.97               | 0.43                 |
| TJ_6      | 691,755,646       | 11.07              | 2.25               | 0.4                  |
| TJ_7      | 1,028,091,322     | 16.45              | 2.68               | 0.55                 |
| TJ_8      | 1,529,697,587     | 24.47              | 4.9                | 0.9                  |
| YJ_9      | 1,459,836,330     | 23.36              | 4.58               | 0.85                 |
| TJ_10     | 1,277,866,878     | 20.44              | 3.81               | 0.72                 |

**Table S5. Coverage depth and degree statistics of RAD-seq of bullfrog samples (continued)**

| Sample ID | Covered Bases(bp) | Coverage<br>1X (%) | Coverage<br>5X (%) | Average Depth<br>(x) |
|-----------|-------------------|--------------------|--------------------|----------------------|
| JZ_1      | 1,516,701,403     | 24.27              | 5.69               | 0.97                 |
| JZ_2      | 1,430,667,976     | 22.89              | 4.27               | 0.81                 |
| JZ_3      | 1,417,361,824     | 22.68              | 4.45               | 0.81                 |
| JZ_4      | 1,514,169,877     | 24.23              | 5.3                | 0.93                 |
| JZ_5      | 1,334,991,428     | 21.36              | 4.57               | 0.8                  |
| JZ_6      | 1,346,059,988     | 21.54              | 6.17               | 0.97                 |
| JZ_7      | 953,670,571       | 15.26              | 4.14               | 0.65                 |
| JZ_8      | 1,693,215,793     | 27.09              | 9.28               | 1.41                 |
| JZ_9      | 1,527,762,596     | 24.44              | 8.25               | 1.25                 |
| JZ_10     | 1,356,823,263     | 21.71              | 6.86               | 1.04                 |
| ZJ_1      | 1,404,121,930     | 22.46              | 6.63               | 1.02                 |
| ZJ_2      | 1,278,524,897     | 20.46              | 5.83               | 0.91                 |
| ZJ_3      | 1,115,671,925     | 17.85              | 4.64               | 0.75                 |
| ZJ_4      | 1,281,349,350     | 20.5               | 5.79               | 0.91                 |
| ZJ_5      | 1,317,959,299     | 21.09              | 6.09               | 0.94                 |
| ZJ_6      | 1,107,243,901     | 17.71              | 4.58               | 0.74                 |
| ZJ_7      | 994,179,307       | 15.91              | 3.99               | 0.65                 |
| ZJ_8      | 1,340,853,195     | 21.45              | 7.01               | 1.06                 |
| ZJ_9      | 985,044,316       | 15.76              | 4.81               | 0.73                 |
| ZJ_10     | 1,062,699,747     | 17                 | 5.23               | 0.79                 |
| SC_1      | 1,299,990,709     | 20.8               | 6.49               | 0.98                 |
| SC_2      | 1,173,278,073     | 18.77              | 5.72               | 0.87                 |
| SC_3      | 1,170,783,594     | 18.73              | 5.68               | 0.87                 |
| SC_4      | 1,165,701,265     | 18.65              | 5.55               | 0.85                 |
| SC_5      | 1,195,450,345     | 19.13              | 5.83               | 0.89                 |
| SC_6      | 1,103,178,705     | 17.65              | 5.2                | 0.8                  |
| SC_7      | 990,184,965       | 15.84              | 4.5                | 0.7                  |
| SC_8      | 1,277,032,504     | 20.43              | 5.85               | 0.91                 |
| SC_9      | 1,259,562,915     | 20.15              | 5.89               | 0.91                 |
| SC_10     | 1,079,521,852     | 17.27              | 4.76               | 0.75                 |

**Table S5. Coverage depth and degree statistics of RAD-seq of bullfrog samples (continued)**

| Sample ID | Covered Bases(bp) | Coverage<br>1X (%) | Coverage<br>5X (%) | Average Depth<br>(x) |
|-----------|-------------------|--------------------|--------------------|----------------------|
| YN_1      | 886,262,824       | 14.18              | 3.29               | 0.55                 |
| YN_2      | 870,505,345       | 13.93              | 3.28               | 0.54                 |
| YN_3      | 936,048,092       | 14.98              | 3.73               | 0.61                 |
| YN_4      | 728,272,156       | 11.65              | 2.5                | 0.44                 |
| YN_5      | 1,508,313,169     | 24.13              | 4.79               | 0.88                 |
| YN_6      | 1,695,222,720     | 27.12              | 5.9                | 1.04                 |
| YN_7      | 1,948,146,166     | 31.17              | 7.66               | 1.29                 |
| YN_8      | 1,525,004,753     | 24.4               | 4.92               | 0.9                  |
| YN_9      | 1,568,834,109     | 25.1               | 5.23               | 0.95                 |
| YN_10     | 1,408,960,608     | 22.54              | 4.34               | 0.81                 |
| SD_1      | 1,392,601,593     | 22.28              | 4.85               | 0.84                 |
| SD_2      | 1,196,764,132     | 19.15              | 3.88               | 0.7                  |
| SD_3      | 1,081,891,204     | 17.31              | 3.54               | 0.63                 |
| SD_4      | 1,418,946,535     | 22.7               | 5.17               | 0.88                 |
| SD_5      | 767,271,934       | 12.28              | 2.15               | 0.41                 |
| SD_6      | 1,236,602,296     | 19.78              | 4.26               | 0.74                 |
| SD_7      | 1,082,065,792     | 17.31              | 3.63               | 0.63                 |
| SD_8      | 1,559,791,479     | 24.96              | 6.72               | 1.05                 |
| SD_9      | 1,744,283,524     | 27.91              | 7.48               | 1.19                 |
| SD_10     | 1,404,674,340     | 22.47              | 5.11               | 0.87                 |
| HN_1      | 1,151,565,362     | 18.42              | 7.42               | 1.06                 |
| HN_2      | 595,783,643       | 9.53               | 3.38               | 0.49                 |
| HN_3      | 1,188,623,258     | 19.02              | 7.9                | 1.13                 |
| HN_4      | 610,802,980       | 9.77               | 3.29               | 0.47                 |
| HN_5      | 718,100,949       | 11.49              | 4.07               | 0.58                 |
| HN_6      | 901,397,795       | 14.42              | 5.45               | 0.78                 |
| HN_7      | 876,774,657       | 14.03              | 5.17               | 0.74                 |
| HN_8      | 755,189,401       | 12.08              | 4.28               | 0.61                 |
| HN_9      | 907,487,470       | 14.52              | 5.38               | 0.78                 |
| HN_10     | 778,292,088       | 12.45              | 4.46               | 0.64                 |

**Table S5. Coverage depth and degree statistics of RAD-seq of bullfrog samples (continued)**

| Sample ID | Covered Bases(bp) | Coverage<br>1X (%) | Coverage<br>5X (%) | Average Depth<br>(x) |
|-----------|-------------------|--------------------|--------------------|----------------------|
| MK_1      | 651,646,573       | 10.43              | 3.35               | 0.51                 |
| MK_2      | 882,554,745       | 14.12              | 5.4                | 0.8                  |
| MK_3      | 1,112,808,057     | 17.8               | 7.2                | 1.05                 |
| MK_4      | 1,185,818,570     | 18.97              | 7.9                | 1.16                 |
| MK_5      | 828,317,089       | 13.25              | 4.71               | 0.69                 |
| MK_6      | 882,445,030       | 14.12              | 3.39               | 0.56                 |
| MK_7      | 919,059,465       | 14.7               | 5.3                | 0.79                 |
| MK_8      | 744,954,663       | 11.92              | 4.34               | 0.63                 |
| MK_9      | 748,328,820       | 11.97              | 4.09               | 0.6                  |
| MK_10     | 878,626,426       | 14.06              | 3.31               | 0.56                 |

**Table S6. SNP functional information in genome region of bullfrog**

| Type                                           | Count      | Percent |
|------------------------------------------------|------------|---------|
| 3_prime_UTR_variant                            | 58,714     | 0.17%   |
| 5_prime_UTR_premature_start_codon_gain_variant | 6,064      | 0.02%   |
| 5_prime_UTR_variant                            | 35,933     | 0.10%   |
| downstream_gene_variant                        | 646,262    | 1.86%   |
| intergenic_region                              | 31,936,431 | 91.77%  |
| intragenic_variant                             | 199        | 0.00%   |
| intron_variant                                 | 1,341,559  | 3.86%   |
| missense_variant                               | 67,111     | 0.19%   |
| non_coding_transcript_exon_variant             | 23         | 0.00%   |
| non_coding_transcript_variant                  | 523        | 0.00%   |
| splice_acceptor_variant                        | 328        | 0.00%   |
| splice_donor_variant                           | 396        | 0.00%   |
| splice_region_variant                          | 8,257      | 0.02%   |
| start_lost                                     | 314        | 0.00%   |
| stop_gained                                    | 2,433      | 0.01%   |
| stop_lost                                      | 289        | 0.00%   |
| stop_retained_variant                          | 112        | 0.00%   |
| synonymous_variant                             | 47,323     | 0.14%   |
| upstream_gene_variant                          | 649,594    | 1.87%   |

**3\_prime\_UTR\_variant:** Number and proportion of SNPs in the 3' untranslated region (3'UTR).

**5\_prime\_UTR\_premature\_start\_codon\_gain\_variant:** Number and proportion of SNPs in the 5' untranslated region (5'UTR) that result in the gain of a premature start codon.

**5\_prime\_UTR\_variant:** Number and proportion of SNPs in the 5' untranslated region (5'UTR).

**Downstream\_gene\_variant:** Number and proportion of SNPs in the downstream region of a gene.

**Intergenic\_region:** Number and proportion of SNPs in the region between genes.

**Intragenic\_variant:** Number and proportion of SNPs in non-functional regions within a gene.

**Intron\_variant:** Number and proportion of SNPs in intronic regions (regions within the gene but not part of the coding sequence).

**Missense\_variant:** Number and proportion of SNPs in exonic regions that result in a change in the amino acid sequence (non-synonymous mutation).

**Non\_coding\_transcript\_exon\_variant:** Variant in exonic regions of non-coding transcripts.

**Non\_coding\_transcript\_variant:** Variant in non-coding transcripts.

**Splice\_acceptor\_variant:** Number and proportion of SNPs at the junction region on the left side of an intron.

**Splice\_donor\_variant:** Number and proportion of SNPs at the junction region on the right side of an intron.

**Splice\_region\_variant:** Number and proportion of SNPs within 2 base pairs of exon-intron junctions.

**Start\_lost:** Number and proportion of SNPs that result in the loss of the start codon.

**Stop\_gained:** Number and proportion of SNPs that result in the gain of a stop codon.

**Stop\_lost:** Number and proportion of SNPs that result in the loss of a stop codon.

**Stop\_retained\_variant:** Number and proportion of SNPs that result in a change in the coding sequence of a stop codon.

**Synonymous\_variant:** Number and proportion of SNPs that result in a synonymous mutation (no change in the amino acid sequence).

**Upstream\_gene\_variant:** Number and proportion of SNPs in the upstream region of a gene.



**Table S7. Genomic regions and candidate genes identified by top 1% Fst for different populations of bullfrogs with RAD-seq**

|                          | scaffold   | target | start  | end    | gene                       |
|--------------------------|------------|--------|--------|--------|----------------------------|
| pop1 vs<br>pop2,<br>pop3 | KX686108.1 | gene   | 2948   | 3908   | ID=gene22209;              |
|                          |            |        |        |        | Name=nad1                  |
|                          | KX686108.1 | gene   | 3909   | 3979   | ID=gene22210;              |
|                          |            |        |        |        | Name=trnI                  |
|                          | KX686108.1 | gene   | 3980   | 4050   | ID=gene22211;              |
|                          |            |        |        |        | Name=trnQ                  |
|                          | KV980795.1 | gene   | 1473   | 16730  | ID=gene14184;              |
|                          |            |        |        |        | Name=AB205_0095820         |
|                          | KV973396.1 | gene   | 7607   | 18207  | ID=gene14316;              |
|                          |            |        |        |        | Name=AB205_0183750         |
|                          | KZ061044.1 | gene   | 1      | 1363   | ID=gene17650;              |
|                          |            |        |        |        | Name=AB205_0001660         |
|                          | KV924641.1 | gene   | 264534 | 282451 | ID=gene1243;               |
|                          |            |        |        |        | Name=AB205_0156310         |
| pop2 vs<br>pop1,<br>pop3 | KX686108.1 | gene   | 2948   | 3908   | ID=gene22209;<br>Name=nad1 |
|                          | KX686108.1 | gene   | 3909   | 3979   | ID=gene22210;<br>Name=trnI |
|                          | KX686108.1 | gene   | 3980   | 4050   | ID=gene22211;<br>Name=trnQ |
| pop3 vs<br>pop1,<br>pop2 | KX686108.1 | gene   | 2948   | 3908   | ID=gene22209;<br>Name=nad1 |
|                          | KX686108.1 | gene   | 3909   | 3979   | ID=gene22210;<br>Name=trnI |
|                          | KX686108.1 | gene   | 3980   | 4050   | ID=gene22211;<br>Name=trnQ |
